# Supplementary material
Source: PubMed Central journal article supplement (PMC1798330)
Supplement: annrheumd_ard.2006.055251_1.pdf [file annrheumd_ard.2006.055251_1.pdf]

### 3Appendix 1. Search strategy for gout – example from MEDLINE

Database: Ovid MEDLINE(R) <1966 to January Week 4 2005>

Search Strategy:

```
-----  
1      exp GOUT/ or gout.mp. (7111)  
2      gouty arthritis.mp. or exp Arthritis, Gouty/ (786)  
3      podagra.mp. (99)  
4      toph$.mp. (549)  
5      monosodium urate crystal$.mp. (181)  
6      1 or 2 or 3 or 4 or 5 (7356)  
7      limit 6 to human (6916)  
*****
```
